# Supplementary material for: Targeted Liposomes Encapsulating miR-603 Complexes Enhance Radiation Sensitivity of Patient-Derived Glioblastoma Stem-Like Cells
Source: Pharmaceutics. 2021 Jul 21;13(8):1115. doi: 10.3390/pharmaceutics13081115 (PMC8399469; doi:10.3390/pharmaceutics13081115)
Supplement: Supplementary file 1 [file pharmaceutics-13-01115-s001.zip › pharmaceutics-1251894-supp-final.pdf]

# Supplementary Materials: Targeted Liposomes Encapsulating miR-603 Complexes Enhance Radiation Sensitivity of Patient-Derived Glioblastoma Stem-Like Cells

Ahmed M. Shabana, Beibei Xu, Zachary Schneiderman, Jun Ma, Clark C. Chen and Efrosini Kokkoli

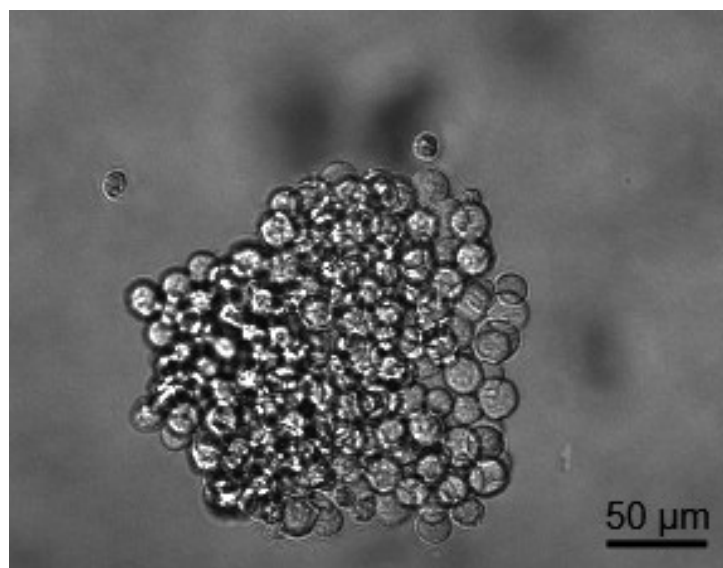

**Figure S1.** Representative bright field microscopy image of a GBM-CCC-001 neurosphere.

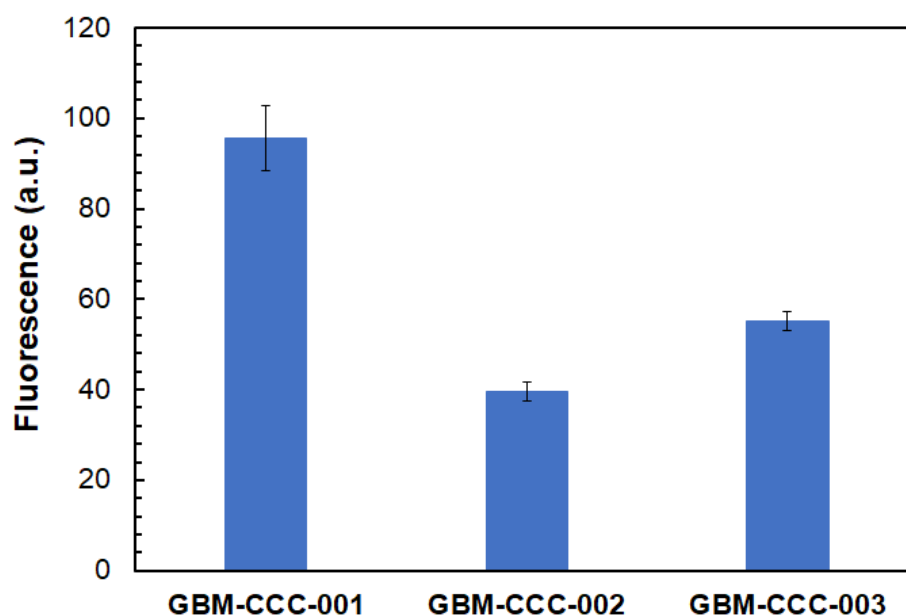

**Figure S2.**  $\alpha_5\beta_1$  integrin expression in patient-derived glioblastoma stem-like cells. Data are presented as mean  $\pm$  SD ( $n = 3$ ).

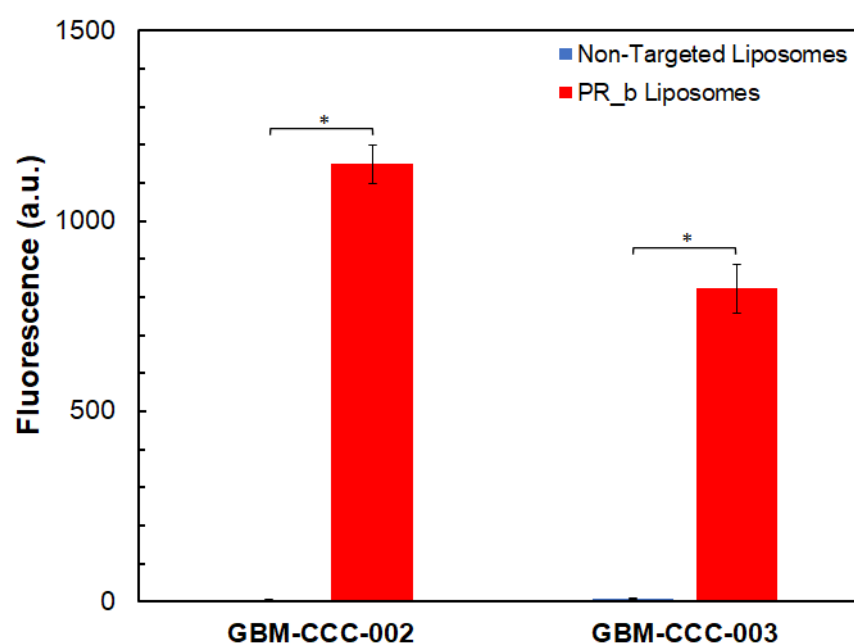

**Figure S3.** Cell association of non-targeted liposomes or PR<sub>b</sub>-functionalized liposomes with GBM-CCC-002 and GBM-CCC-003 cells measured via flow cytometry. Cells were incubated with liposomes for 48 h at 37 °C. Data are presented as mean ± SD ( $n = 3$ ). Student's t-test analysis was used to determine significance, \*  $p < 0.05$ .

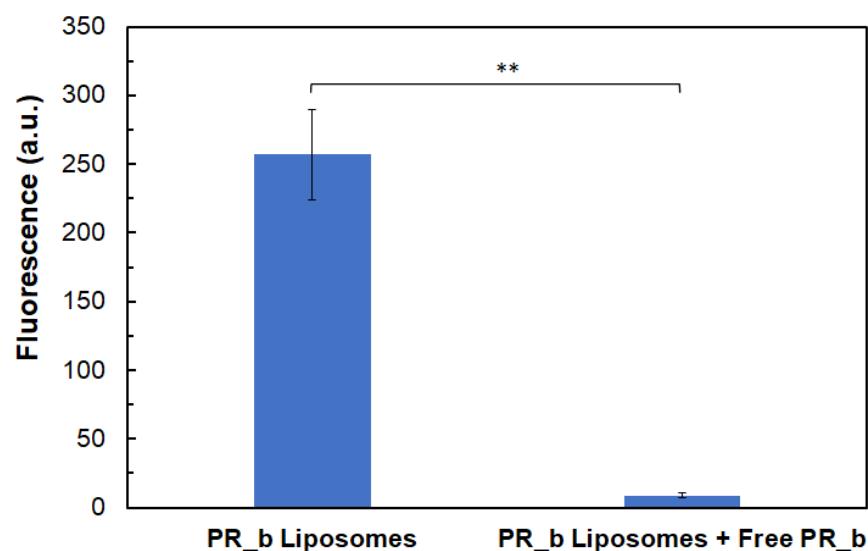

**Figure S4.** Blocking experiment. Cell association of PR<sub>b</sub>-functionalized liposomes was measured via flow cytometry in GBM-CCC-001 cells pretreated with or without free PR<sub>b</sub> peptide. Cell surface integrins were blocked by free PR<sub>b</sub> peptide for 1 h at 37 °C before incubating the cells with PR<sub>b</sub> liposomes for an additional 1 h at 37 °C. Data are presented as mean ± SD ( $n = 3$ ). Student's t-test analysis was used to determine significance, \*\*  $p < 0.01$ .

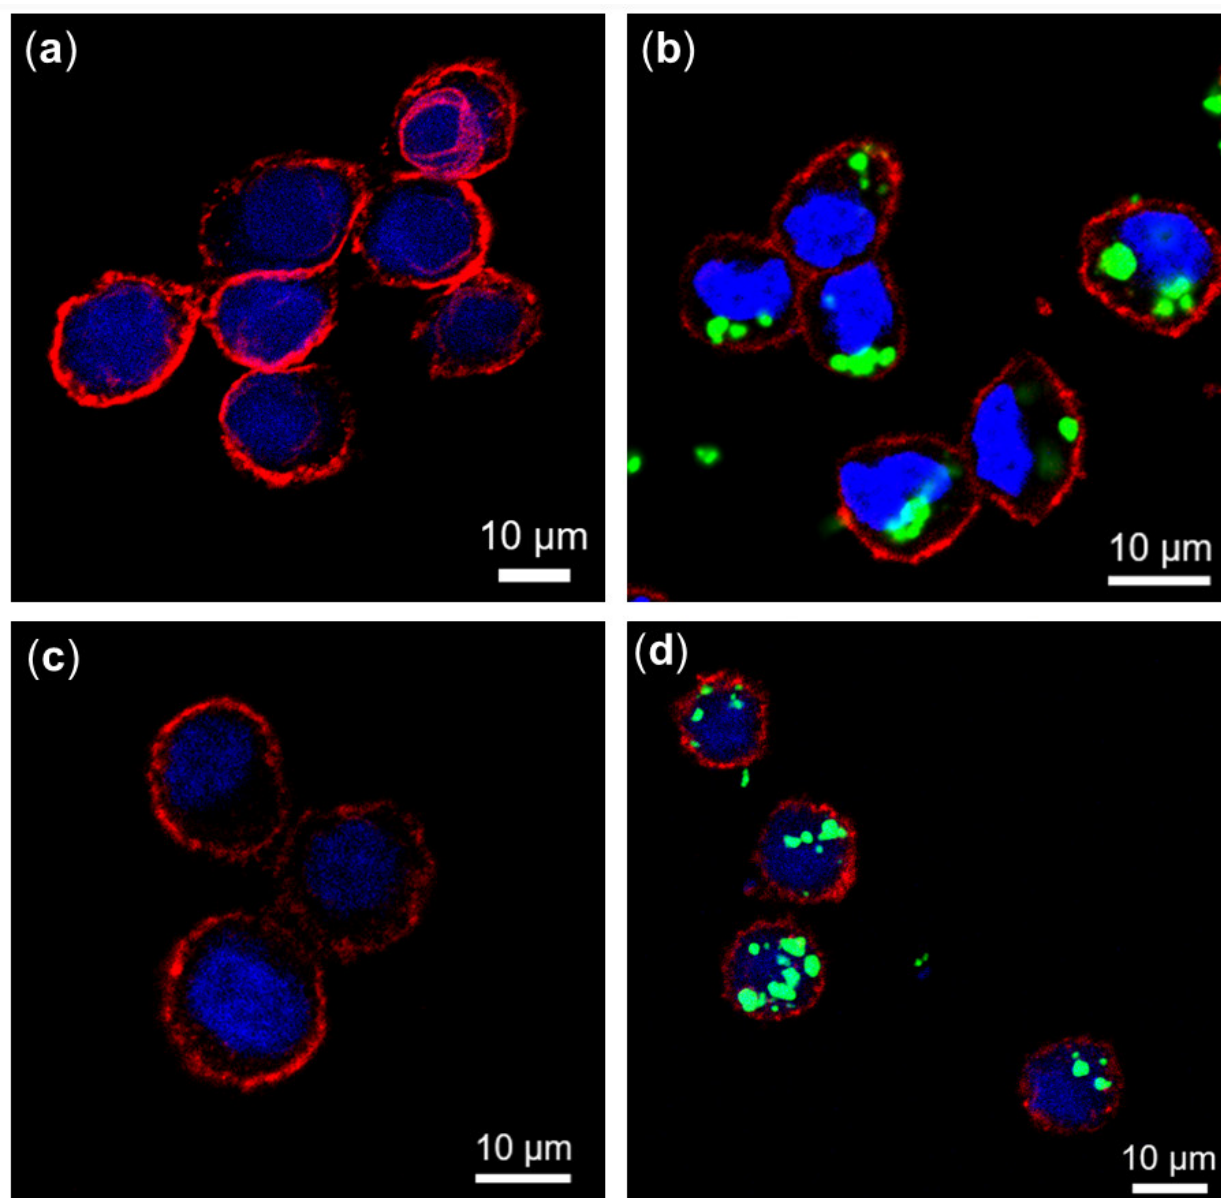

**Figure S5.** Confocal microscopy images of cells incubated with liposomes for 48 h at 37 °C. Top row shows GBM-CCC-002 cells incubated with (a) non-targeted liposomes and (b) PR<sub>b</sub>-functionalized liposomes. Bottom row shows GBM-CCC-003 cells incubated with (c) non-targeted liposomes and (d) PR<sub>b</sub>-functionalized liposomes. Liposomes with encapsulated calcein are shown in green, cell membranes in red and nuclei in blue.

**Table S1.** Characterization of miR-603/PEI complexes at different N:P ratios.

| N:P ratio | Diameter (nm) <sup>1</sup> | PDI <sup>2</sup> | Zeta Potential (mV) |
|-----------|----------------------------|------------------|---------------------|
| 2         | 185.8 ± 73.9               | 0.56 ± 0.18      | −18.9 ± 2.0         |
| 4         | 103.1 ± 30.2               | 0.43 ± 0.49      | 9.0 ± 1.8           |
| 6         | 103.9 ± 24.4               | 0.11 ± 0.04      | 20.2 ± 1.1          |
| 8         | 99.0 ± 16.6                | 0.26 ± 0.04      | 18.9 ± 1.6          |

<sup>1</sup> Hydrodynamic diameters are reported based on intensity from DLS. <sup>2</sup> Polydispersity index. Data are reported as mean ± SD; *n* = 3.

**Table S2.** Statistical analysis comparing relative miR-603 mRNA level in GBM-CCC-001 cells following indicated treatments.

|                              | PR_b Liposomes | PR_b Liposomes<br>w/ miR-603 | PR_b Liposomes<br>w/ miR-603/PEI |
|------------------------------|----------------|------------------------------|----------------------------------|
| PBS Control                  | $p > 0.05$     | $p < 0.05$                   | $p < 0.00001$                    |
| PR_b Liposomes               |                | $p < 0.05$                   | $p < 0.00001$                    |
| PR_b Liposomes w/<br>miR-603 |                |                              | $p < 0.0001$                     |

$p$ -values from one-way ANOVA with post-hoc Tukey's HSD test analysis comparing data shown in Figure 3a ( $n = 3$ ).

**Table S3.** Statistical analysis comparing relative IGF1 mRNA level in GBM-CCC-001 cells following indicated treatments.

|                              | PR_b Liposomes | PR_b Liposomes<br>w/ miR-603 | PR_b Liposomes<br>w/ miR-603/PEI |
|------------------------------|----------------|------------------------------|----------------------------------|
| PBS Control                  | $p > 0.05$     | $p > 0.05$                   | $p < 0.0005$                     |
| PR_b Liposomes               |                | $p > 0.05$                   | $p < 0.0005$                     |
| PR_b Liposomes w/<br>miR-603 |                |                              | $p < 0.001$                      |

$p$ -values from one-way ANOVA with post-hoc Tukey's HSD test analysis comparing data shown in Figure 3b ( $n = 3$ ).

**Table S4.** Statistical analysis comparing relative IGF1R mRNA level in GBM-CCC-001 cells following indicated treatments.

|                              | PR_b Liposomes | PR_b Liposomes<br>w/ miR-603 | PR_b Liposomes<br>w/ miR-603/PEI |
|------------------------------|----------------|------------------------------|----------------------------------|
| PBS Control                  | $p > 0.05$     | $p > 0.05$                   | $p < 0.0001$                     |
| PR_b Liposomes               |                | $p > 0.05$                   | $p < 0.00005$                    |
| PR_b Liposomes w/<br>miR-603 |                |                              | $p < 0.005$                      |

$p$ -values from one-way ANOVA with post-hoc Tukey's HSD test analysis comparing data shown in Figure 3b ( $n = 3$ ).

**Table S5.** Statistical analysis comparing differences in stem cell frequency after 24 h incubation with liposomal formulations.

|                                       | <b>PBS Control + IR</b> | <b>PR_b Liposomes</b> | <b>PR_b Liposomes + IR</b> | <b>PR_b Liposomes w/ miR-603</b> | <b>PR_b Liposomes w/ miR-603 + IR</b> | <b>PR_b Liposomes w/ miR-603/PEI</b> | <b>PR_b Liposomes w/ miR-603/PEI + IR</b> |
|---------------------------------------|-------------------------|-----------------------|----------------------------|----------------------------------|---------------------------------------|--------------------------------------|-------------------------------------------|
| <b>PBS Control</b>                    | $p < 0.00001$           | $p > 0.05$            | $p < 0.00001$              | $p < 0.005$                      | $p < 0.00001$                         | $p < 0.00001$                        | $p < 0.00001$                             |
| <b>PBS Control + IR</b>               |                         | $p < 0.00001$         | $p > 0.05$                 | $p < 0.00001$                    | $p > 0.05$                            | $p > 0.05$                           | $p < 0.00001$                             |
| <b>PR_b Liposomes</b>                 |                         |                       | $p < 0.00001$              | $p < 0.01$                       | $p < 0.00001$                         | $p < 0.00001$                        | $p < 0.00001$                             |
| <b>PR_b Liposomes + IR</b>            |                         |                       |                            | $p < 0.00001$                    | $p > 0.05$                            | $p > 0.05$                           | $p < 0.00001$                             |
| <b>PR_b Liposomes w/ miR-603</b>      |                         |                       |                            |                                  | $p < 0.00001$                         | $p < 0.00001$                        | $p < 0.00001$                             |
| <b>PR_b Liposomes w/ miR-603 + IR</b> |                         |                       |                            |                                  |                                       | $p > 0.05$                           | $p < 0.00001$                             |
| <b>PR_b Liposomes w/ miR-603/PEI</b>  |                         |                       |                            |                                  |                                       |                                      | $p < 0.00001$                             |

$p$ -values as calculated using the ELDA software comparing data shown in Figure 4b (total of 24 replicate wells per cell dilution in each treatment group).

**Table S6.** Statistical analysis comparing differences in stem cell frequency after 48 h incubation with liposomal formulations.

|                                       | <b>PBS Control + IR</b> | <b>PR_b Liposomes</b> | <b>PR_b Liposomes + IR</b> | <b>PR_b Liposomes w/ miR-603</b> | <b>PR_b Liposomes w/ miR-603 + IR</b> | <b>PR_b Liposomes w/ miR-603/PEI</b> | <b>PR_b Liposomes w/ miR-603/PEI + IR</b> |
|---------------------------------------|-------------------------|-----------------------|----------------------------|----------------------------------|---------------------------------------|--------------------------------------|-------------------------------------------|
| <b>PBS Control</b>                    | $p < 0.00001$           | $p > 0.05$            | $p < 0.00001$              | $p < 0.05$                       | $p < 0.00001$                         | $p < 0.00001$                        | $p < 0.00001$                             |
| <b>PBS Control + IR</b>               |                         | $p < 0.00001$         | $p > 0.05$                 | $p < 0.00001$                    | $p > 0.05$                            | $p > 0.05$                           | $p < 0.00001$                             |
| <b>PR_b Liposomes</b>                 |                         |                       | $p < 0.00001$              | $p > 0.05$                       | $p < 0.00001$                         | $p < 0.00001$                        | $p < 0.00001$                             |
| <b>PR_b Liposomes + IR</b>            |                         |                       |                            | $p < 0.00001$                    | $p > 0.05$                            | $p > 0.05$                           | $p < 0.00001$                             |
| <b>PR_b Liposomes w/ miR-603</b>      |                         |                       |                            |                                  | $p < 0.00001$                         | $p < 0.00001$                        | $p < 0.00001$                             |
| <b>PR_b Liposomes w/ miR-603 + IR</b> |                         |                       |                            |                                  |                                       | $p > 0.05$                           | $p < 0.0005$                              |
| <b>PR_b Liposomes w/ miR-603/PEI</b>  |                         |                       |                            |                                  |                                       |                                      | $p < 0.00001$                             |

$p$ -values as calculated using the ELDA software comparing data shown in Figure 4c (total of 16 replicate wells per cell dilution in each treatment group).
